# Supplementary material
Source: publisher figshare collection journal article supplement (https://acs.figshare.com/ndownloader/files/8220839)
Supplement: Supplementary file 1 [file 8220839]

## Supporting information

### **3D porous graphene nanostructure from a simple, fast, scalable process for high performance flexible gel-type supercapacitors**

*Chun-Chieh Wang, Jiyan Liang, Yi-Hsiu Liao, and Shih-Yuan Lu\**

Department of Chemical Engineering, National Tsing Hua University, Hsinchu 30013, Taiwan

\*Corresponding authors.

E-mail address: [sylu@mx.nthu.edu.tw](mailto:sylu@mx.nthu.edu.tw)

10 pages, 6 figures, and 3 tables.

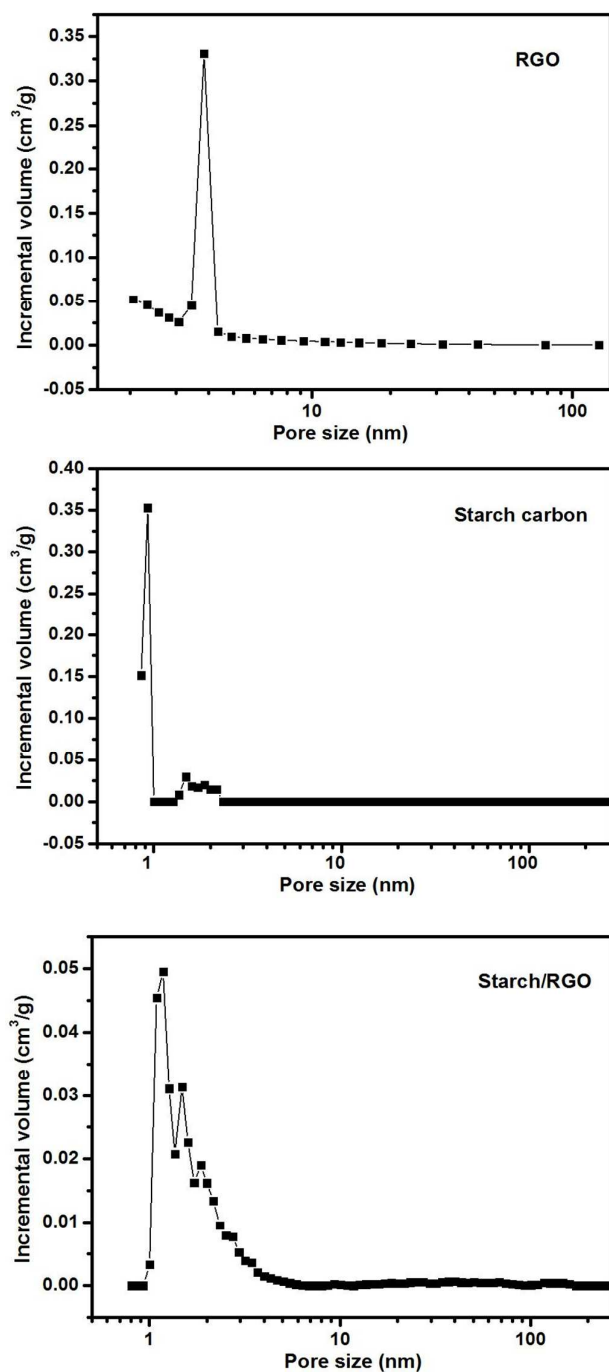

**Figure S1.** Pore size distributions of RGO, starch carbon, and starch/RGO. Pore size distribution of RGO was obtained with Barrett-Joyner-Halenda model, whereas those of starch carbon and starch/RGO were obtained with DFT model.

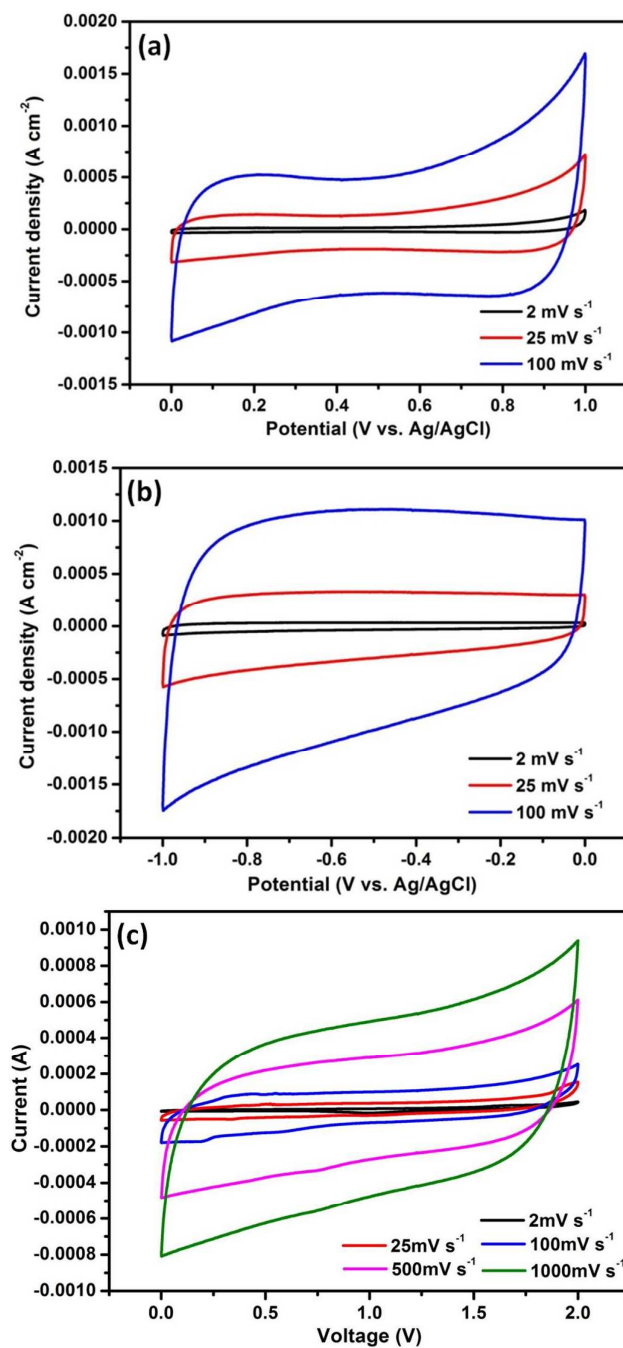

**Figure S2.** CVs of RGO electrode at increasing scan rates in LiCl/PVA gel electrolyte recorded in (a) positive and (b) negative potential windows. (c) CVs of RGO//RGO supercapacitor at increasing scan rates in LiCl/PVA gel electrolyte.

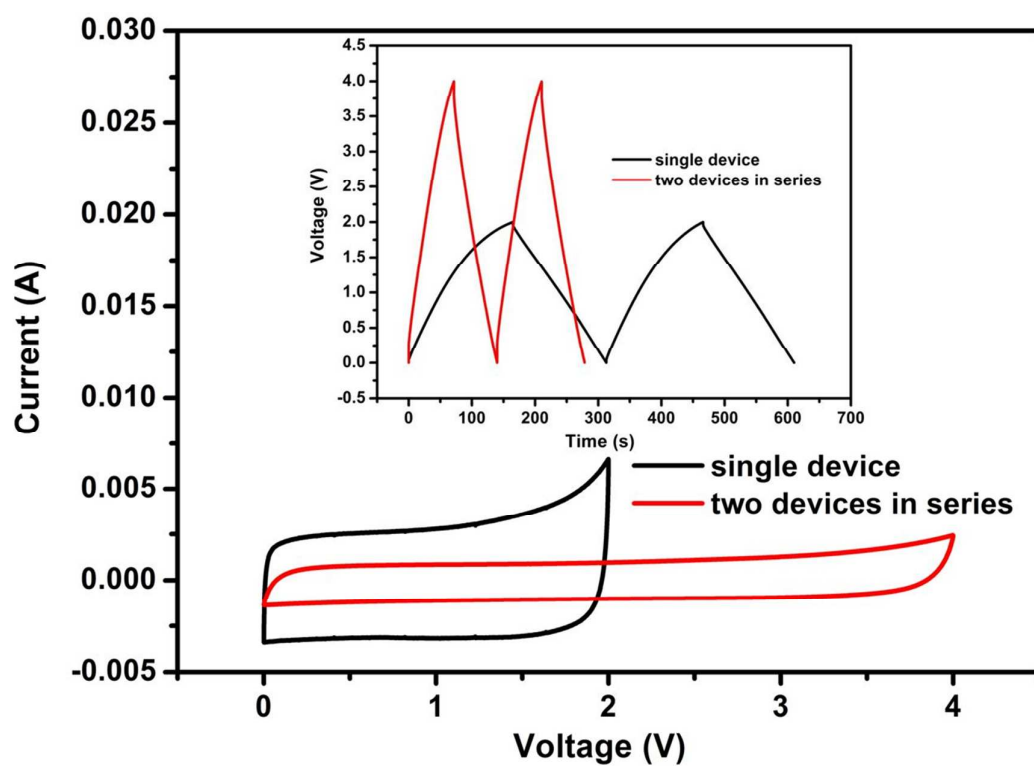

**Figure S3.** CV of two starch/RGO//starch/RGO capacitors connected in serial at  $25 \text{ mV s}^{-1}$ . Inset shows corresponding galvanostatic charge/discharge curves at  $2 \text{ mA}$ .

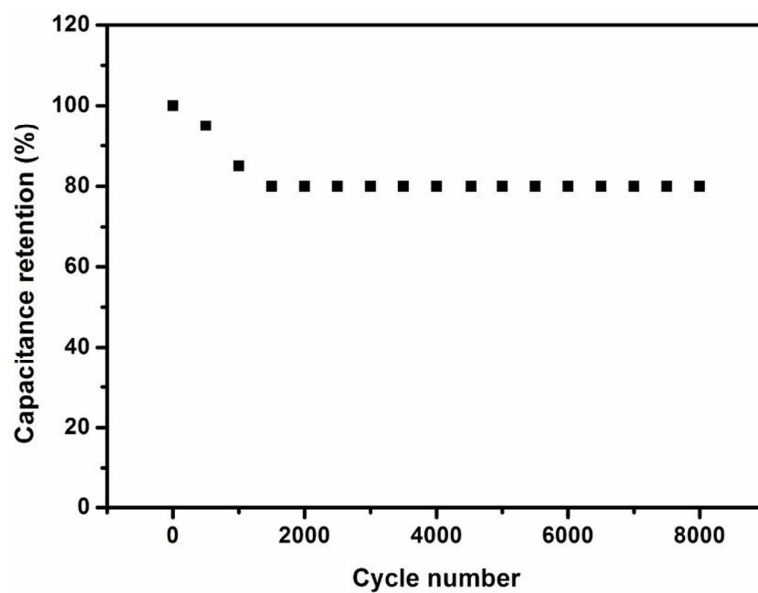

**Figure S4.** Cycling stability of starch/RGO//starch/RGO supercapacitor in LiCl/PVA gel electrolyte. The capacitance data were obtained from galvanostatic charge/discharge at  $10 \text{ A g}^{-1}$ .

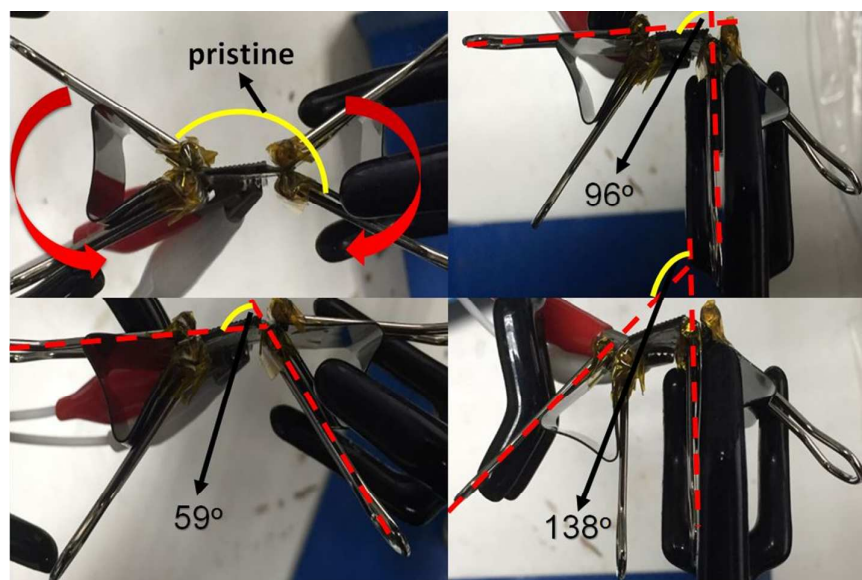

**Figure S5.** Photographs illustrate flexible starch/RGO//starch/RGO supercapacitor under increasing bending angles.

**(a)**

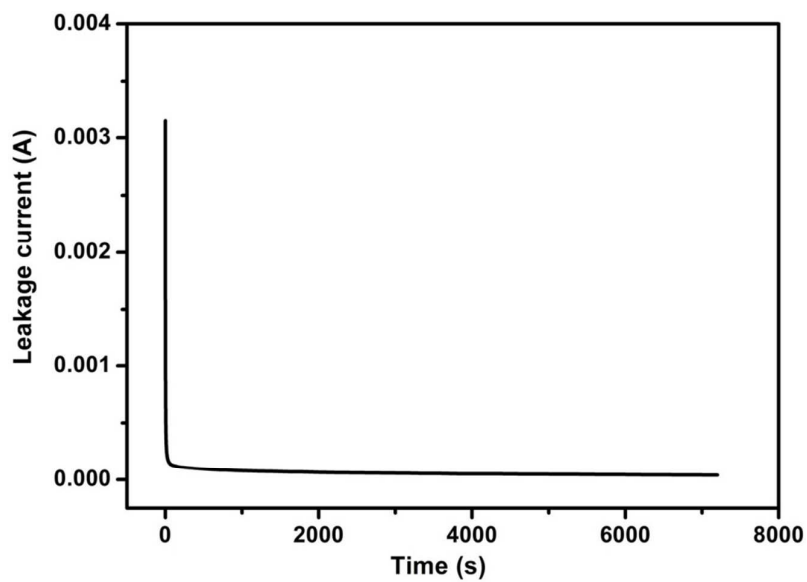

**(b)**

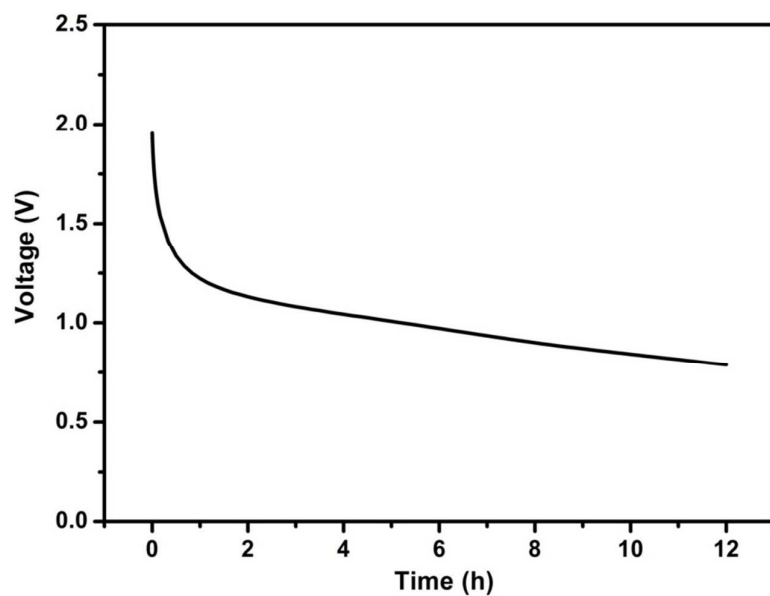

**Figure S6.** (a) Leakage current of starch/RGO//starch/RGO capacitor charged at 2 mA to 2 V and kept at 2 V for 2 h and (b) self-discharge curve of starch/RGO//starch/RGO capacitor after charging at 2 V for 300 s.

**Table S1.** Specific surface areas, pore volumes, and average pore sizes of starch carbon, RGO, and starch/RGO materials.

|               | Specific surface<br>area ( $\text{m}^2 \text{g}^{-1}$ ) | Total pore volume<br>( $\text{cm}^3 \text{g}^{-1}$ ) | Average pore size<br>(nm) |
|---------------|---------------------------------------------------------|------------------------------------------------------|---------------------------|
| starch carbon | 1706                                                    | 0.76                                                 | 1.8                       |
| RGO           | 325                                                     | 0.38                                                 | 4.8                       |
| starch/RGO    | 1519                                                    | 0.75                                                 | 2.0                       |



**Table S2.** Energy and power densities of starch/RGO//starch/RGO supercapacitors at increasing bending angles at scan rate of 100 mV s<sup>-1</sup>.

|                                                 | Flat | Bending at<br>59° | Bending at<br>96° | Bending at<br>138° | Return to<br>flat |
|-------------------------------------------------|------|-------------------|-------------------|--------------------|-------------------|
| <b>Energy density</b><br>(Wh kg <sup>-1</sup> ) | 16.7 | 13.5              | 15.0              | 15.0               | 14.9              |
| <b>Power density</b><br>(kW kg <sup>-1</sup> )  | 3.0  | 2.4               | 2.7               | 2.7                | 2.7               |

**Table S3.** Energy and power densities of starch/RGO//starch/RGO supercapacitors at increasing working temperatures at scan rate of 100 mV s<sup>-1</sup>.

|                                                 | <b>-21°C</b> | <b>3°C</b> | <b>24°C</b> | <b>40°C</b> | <b>60°C</b> | <b>80°C</b> | <b>100°C</b> |
|-------------------------------------------------|--------------|------------|-------------|-------------|-------------|-------------|--------------|
| <b>Energy density</b><br>(Wh kg <sup>-1</sup> ) | 12.8         | 14.0       | 14.9        | 15.8        | 16.3        | 16.9        | 15.3         |
| <b>Power density</b><br>(kW kg <sup>-1</sup> )  | 2.3          | 2.5        | 2.7         | 2.9         | 2.9         | 3.0         | 2.8          |
